# Supplementary material for: Electrochemical ammonia synthesis from nitrite assisted by in situ generated hydrogen atoms on a nickel phosphide catalyst
Source: Royal Society of Chemistry journal article supplement (doi:10.1039/d1cc02410h), 2021-01-01
Supplement: d1cc02410h1.pdf [file d1cc02410h1.pdf]

## Electronic Supporting Information

### Electrochemical ammonia synthesis from nitrite assisted by in-situ generated hydrogen atoms on nickel phosphide catalyst

Xiao Yang,<sup>a,d</sup> Lei Kang,<sup>b</sup> Chuan-Jun Wang,<sup>\*c</sup> Fulai Liu<sup>a,d</sup> and Yong Chen<sup>\*a,d</sup>

<sup>a</sup> Key Laboratory of Photochemical Conversion and Optoelectronic Materials & CAS-HKU Joint Laboratory on New Materials, Technical Institute of Physics and Chemistry, Chinese Academy of Sciences, Beijing 100190, P. R. China

<sup>b</sup> Key Laboratory of Functional Crystals and Laser Technology, Technical Institute of Physics and Chemistry, Chinese Academy of Sciences, Beijing 100190, P. R. China

<sup>c</sup> College of Chemistry and Material Science, Shandong Agricultural University, Tai'an 271018, P. R. China

<sup>d</sup> University of Chinese Academy of Sciences, Beijing 100049, P. R. China

#### Author Contributions

Y. C. and C. J. W. conceptualized the study and led the project. X. Y. performed the bulk of catalyst preparation, characterization, and catalytic tests. F. L. contributed to morphology characterization. L. K. performed the theoretical calculations. All authors contributed to the writing of the manuscript and data analysis.

## Experimental section

**Materials.** All chemicals and solvents were commercial and used as received without further purification. Ni foam (100 mm × 100 mm) was purchased from KUNSHAN JIAYISHENG ELECTRONICS CO., LTD. Carbon rod and saturated Ag/AgCl electrode was bought from Tianjin AIDA Hengsheng Science-Technology Development Co., Ltd. Nessler's reagent was bought from Chengdu HuaXia Chemical Reagent Co. Ltd. (Chengdu, China). Sodium hypophosphite ( $\text{NaH}_2\text{PO}_2$ , ≥99%) was obtained from Xilong Chemical CO., Ltd. (Guangdong, China). Sodium nitrite ( $\text{NaNO}_2$ , ≥99%) and potassium sodium tartrate ( $\text{KNaC}_4\text{H}_4\text{O}_6 \cdot 4\text{H}_2\text{O}$ , ≥99.7%) were bought from Beijing Beihua Fine Chemicals CO., Ltd. (Beijing, China). Sodium hydroxide ( $\text{NaOH}$ , ≥99.7%), hydrochloric acid ( $\text{HCl}$ , ≥37%) and all solvents were obtained from Sinopharm Chemical Reagent Co., Ltd. (Shanghai, China).

**Preparation of  $\text{Ni}_2\text{P}$ .** One piece of nickel foam (1 cm × 2 cm × 0.16 cm) were cleaned by 1 M HCl solution, ethanol and deionized water with the assistance of ultrasonication for 20 min. The pretreated Ni foam and  $\text{NaH}_2\text{PO}_2$  (800 mg) were placed in the porcelain boat and the  $\text{NaH}_2\text{PO}_2$  was set at the upstream side. Then the boat was put into a tube furnace, which was purged with argon (99.99%) for 20 min. The furnace was heated to 500 °C at 2 °C  $\text{min}^{-1}$ , and kept for 120 min. Finally, the furnace naturally cooled to ambient temperature. The Ar flow was maintained throughout the whole tempering process. Then the sample was taken out, washed several times by deionized water and dried in vacuum oven.

**Materials Characterizations.** Powder X-ray diffraction patterns (XRD) were carried out using a Bruker AXSD8. Samples for transmission electron microscopy (TEM) were analyzed by using a transmission electron microscope (JEM 2100) with an accelerating voltage of 200 kV. Scanning electron microscopy (SEM) measurements were conducted on a Hitachi SU-8100 field emission scanning electron microscope. For the TEM measurements,  $\text{Ni}_2\text{P}$  was immersed in ethanol and sonicated for at least 30 min, then dropped on an ultrathin carbon film copper mesh and allowed to dry in air at room temperature prior to these measurements.  $^1\text{H}$  NMR experiments were performed on a 400 MHz Bruker NMR instrument with  $\text{D}_2\text{O}$  as solvent (300  $\mu\text{L}$  solution and 200  $\mu\text{L}$   $\text{D}_2\text{O}$ ).

**Electrochemical measurements.** Electrochemical measurements were performed on a computer-controlled CHI660E electrochemical workstation and conducted in a typical three-electrode setup in H-cell with  $\text{Ni}_2\text{P}$  as working electrode, carbon rod as counter electrode and a commercial Ag/AgCl as reference electrode. The experiments were conducted in an electrolyte solution of 1.0 M NaOH with 0.1 M  $\text{NaNO}_2$ , and stirred at a rate of 500 rpm. All the potentials reported in our work were calibrated with respect to reversible hydrogen electrode (RHE):  $E(\text{RHE}) = E(\text{Ag/AgCl}) + 0.197 + 0.059 \text{ pH}$  unless stated otherwise. The theoretical potential for hydrogen evolution reaction was 0.0 V vs. RHE. The geometrical surface area of the  $\text{Ni}_2\text{P}$  electrode used for electrocatalysis is 1  $\text{cm}^2$  and the current density was calculated using the geometrical surface area of 1  $\text{cm}^2$ . All experiments were carried out at 25 °C without iR-correction.

The Faradaic efficiency for  $\text{NaNO}_2$  reduction was defined as the quantity of electric charges used for producing ammonia divided by the total charge passing through the electrodes during the electrolysis. Six electrons are needed to produce one  $\text{NH}_3$  molecule, so the Faradaic efficiency can be calculated as follows:  $\text{FE}_{\text{NH}_3} = (6 \times C_{\text{NH}_3} \times V \times F)/Q$ , where  $C_{\text{NH}_3}$  is the concentration of ammonia, V is the volume of the NaOH electrolyte, F is the Faraday constant and Q is the total number of charges passing through the catalyst.

**Determination of ammonia.** The quantity of  $\text{NH}_3$  generation was determined through the colorimetric method using Nessler's reagent. First, 10 mL of the electrolyte was taken out after  $\text{NaNO}_2$  reduction. Second, 0.2 mL of potassium sodium tartrate ( $\text{KNaC}_4\text{H}_4\text{O}_6$ , 500 g/L) was added into the solution to chelate soluble metal ion and mixed thoroughly. Third, 0.3 mL of Nessler's reagent was also added into the solution and mixed. Fourth, the solution sat for 15 min for

color development. Finally, the absorbance of the solution at 420 nm was measured using a 10 mm glass cuvette. And the concentration-absorbance curves were calibrated using standard ammonia chloride solutions, as shown in Figure S3, which contained the same concentrations of NaOH used in the electrolysis experiments.

**Computational methods.** The first-principles calculations are performed by the plane-wave pseudopotential method implemented in the CASTEP based on the density functional theory (DFT).<sup>S1-3</sup> The exchange-correlation (XC) functional is described by the local density approximation (LDA).<sup>S4</sup> The ion-electron interactions are modeled by the ultrasoft pseudopotentials<sup>S5</sup> for all constituent elements. A kinetic energy cutoff of 340 eV and Monkhorst-Pack k-point meshes<sup>S6</sup> spanning less than  $0.04/\text{\AA}^3$  in the Brillouin zone are chosen. Meanwhile, the atomic position in unit cell of compounds are fully optimized using the quasi-Newton method.<sup>S7</sup> The convergence thresholds between optimization cycles for energy change, maximum force, maximum stress, and maximum displacement are set as  $5.0 \times 10^{-6}$  eV per atom, 0.01 eV per  $\text{\AA}$ , 0.02 GPa, and  $5.0 \times 10^{-4}$   $\text{\AA}$ , respectively. The optimization terminates when all of these criteria are satisfied. Based on the optimized reactant and product, CASTEP transition state (TS) searches further are performed using synchronous transit methods,<sup>S8</sup> which interpolate a reaction pathway to find a transition state and is useful for predicting barriers to chemical reactions. Complete LST/QST is adopted and begins by performing an LST (Linear Synchronous Transit)/Optimization calculation, which performs a single interpolation to a maximum energy. The TS approximation obtained in that way is used to perform a QST maximization, which alternates searches for an energy maximum with constrained minimizations in order to refine the transition state to a high degree. From that point, another conjugate gradient minimization is performed. The cycle is repeated until a stationary point is located or the number of allowed QST steps is exhausted. Then the total energies of the reactants, products and transition states are obtained to investigate the energy evolution of the catalytic path.

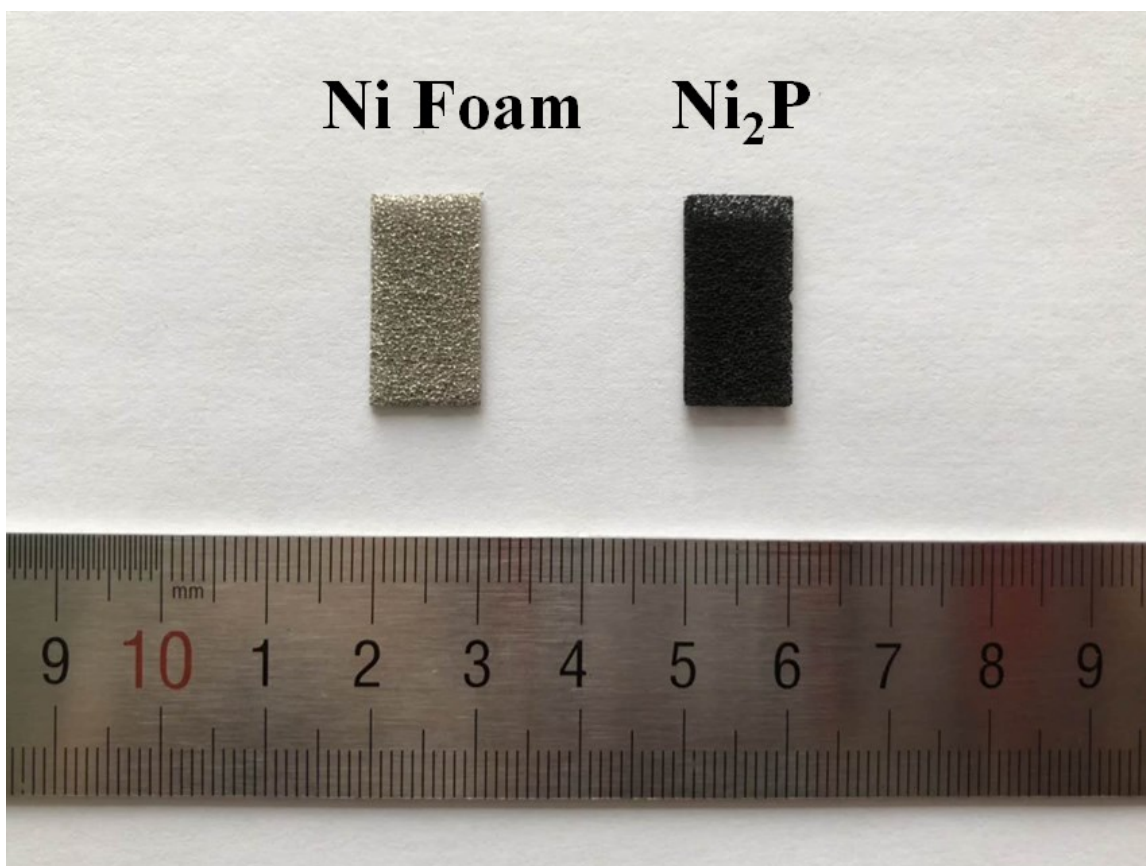

**Fig. S1** Photograph of the nickel foam and Ni<sub>2</sub>P.

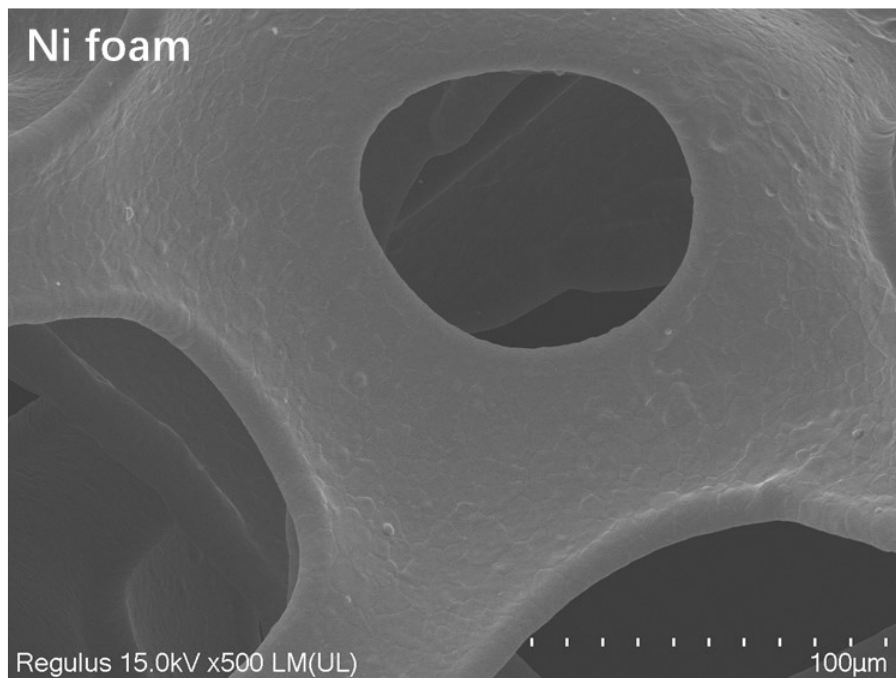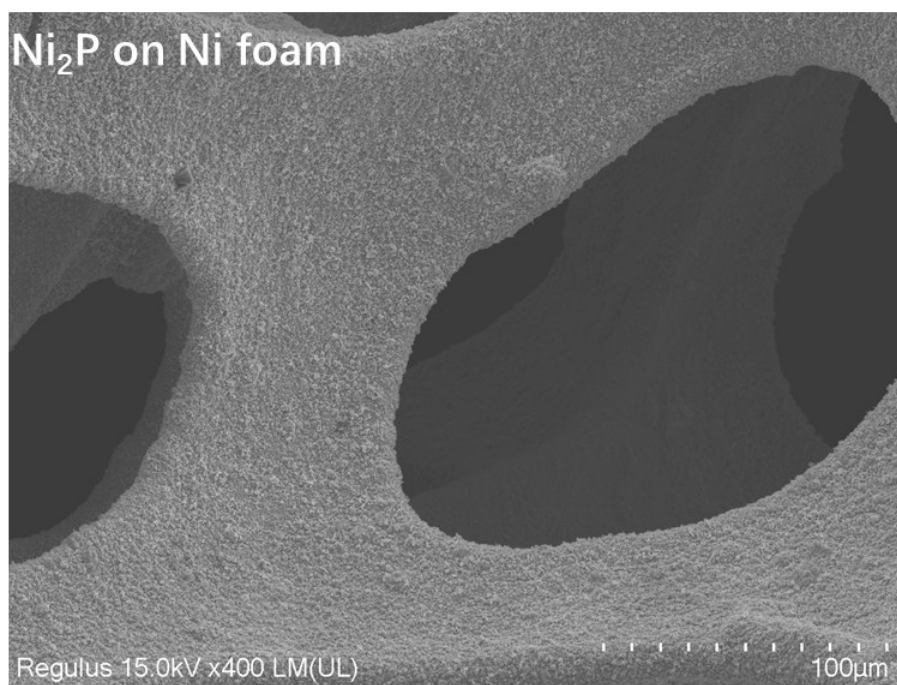

**Fig. S2** SEM Photograph of the Ni foam before (Ni foam) and after phosphorization (Ni<sub>2</sub>P on Ni foam).

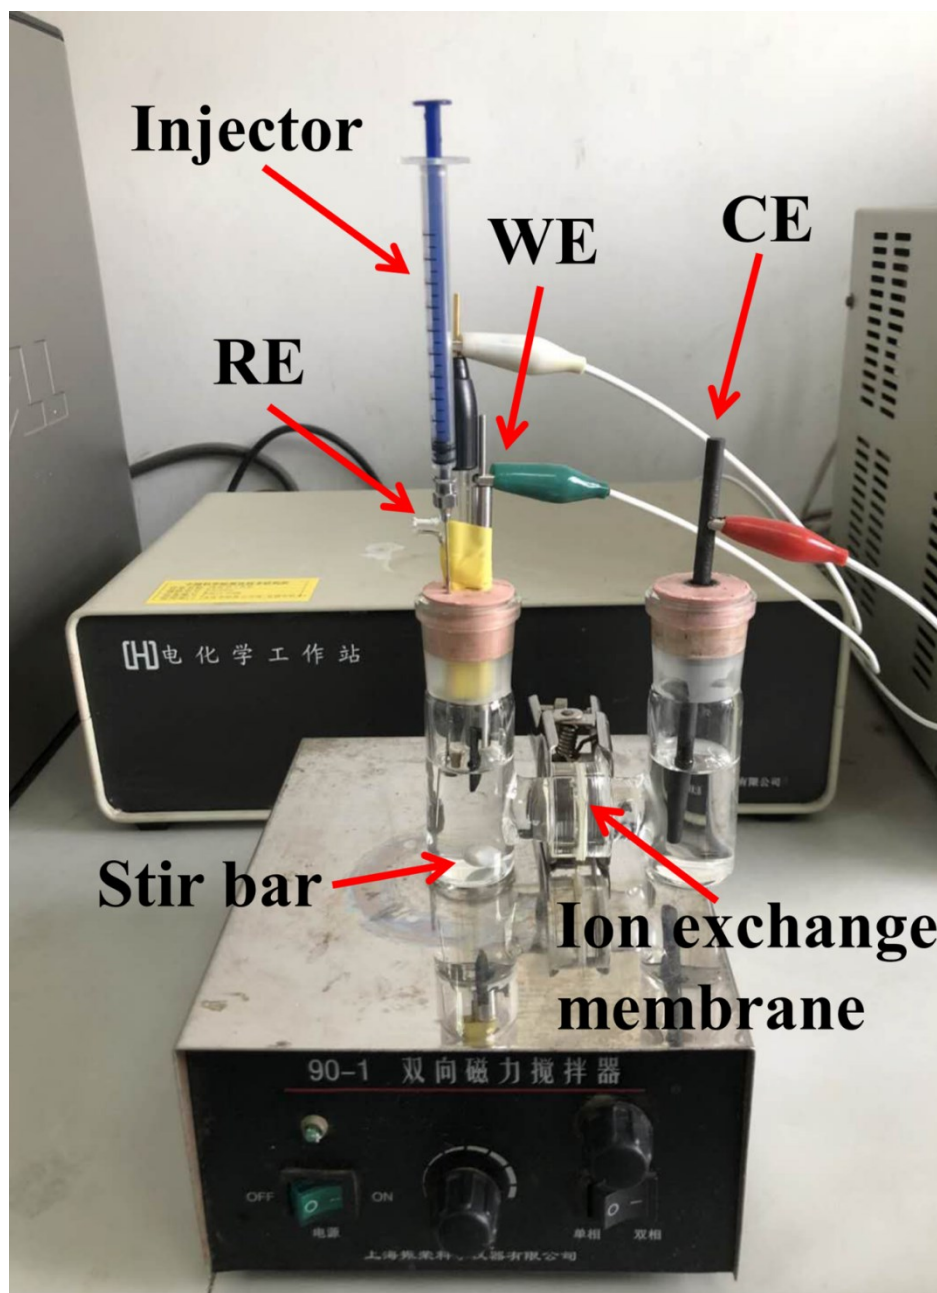

**Fig. S3** Photograph of the H-cell with an injector for adding  $\text{NaNO}_2$  into 1 M NaOH electrolyte.

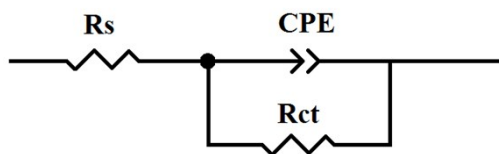

| Sample                                | $R_s$ ( $\Omega$ ) <sup>a</sup> | $R_{ct}$ ( $\Omega$ ) <sup>b</sup> |
|---------------------------------------|---------------------------------|------------------------------------|
| Nichel Foam                           | 1.54                            | 48.55                              |
| Ni <sub>2</sub> P                     | 1.40                            | 15.73                              |
| Nichel Foam + NaNO <sub>2</sub>       | 1.23                            | 9.38                               |
| Ni <sub>2</sub> P + NaNO <sub>2</sub> | 1.11                            | 0.93                               |

<sup>a</sup> $R_s$  is related to the series resistance; <sup>b</sup> $R_{ct}$  denotes the charge transfer resistance.

**Fig. S4** The equivalent circuit and geometric values of the electronic elements extracted from a simplified Randles equivalent circuit.

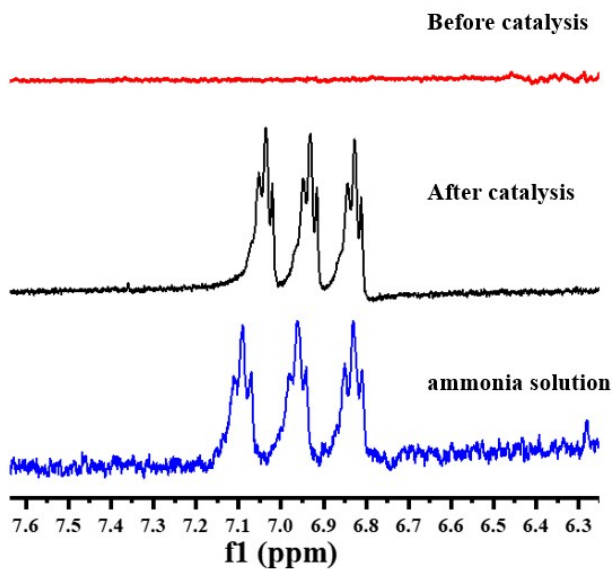

**Fig. S5** <sup>1</sup>H NMR experiments performed with D<sub>2</sub>O solvent.

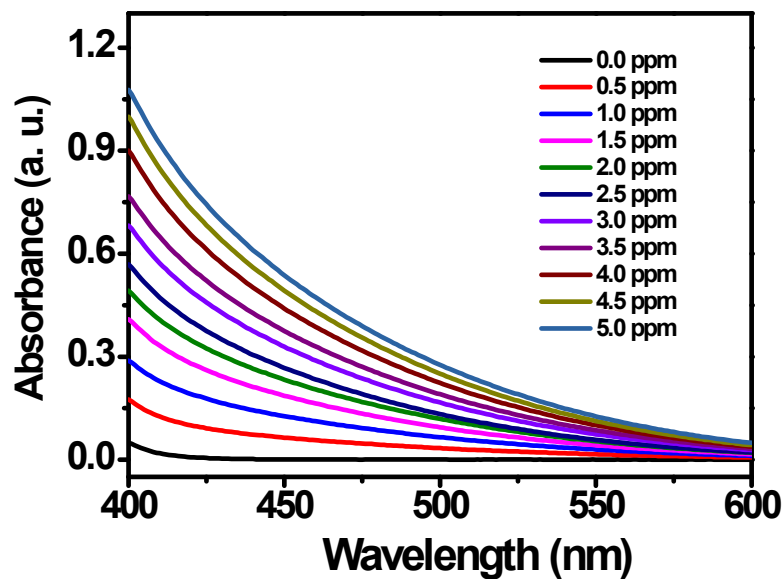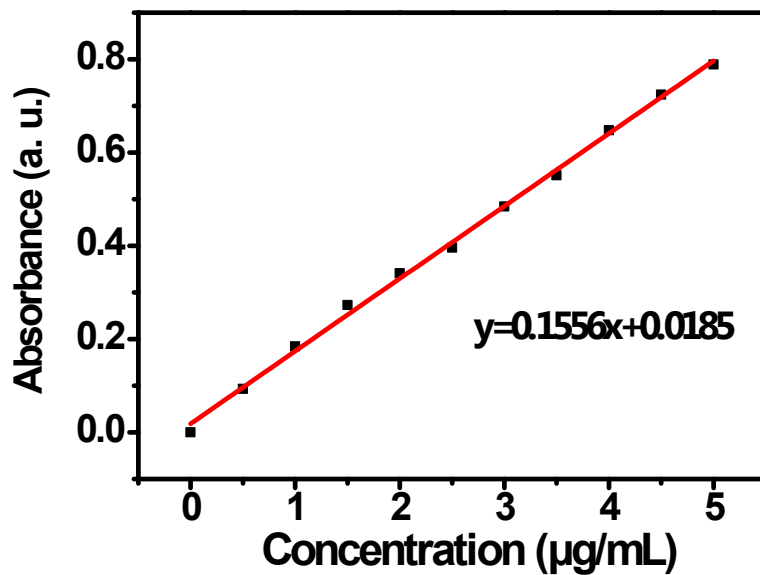

Fig. S6 Calibration curve for colorimetric NH<sub>3</sub> assay using Nessler's reagent.



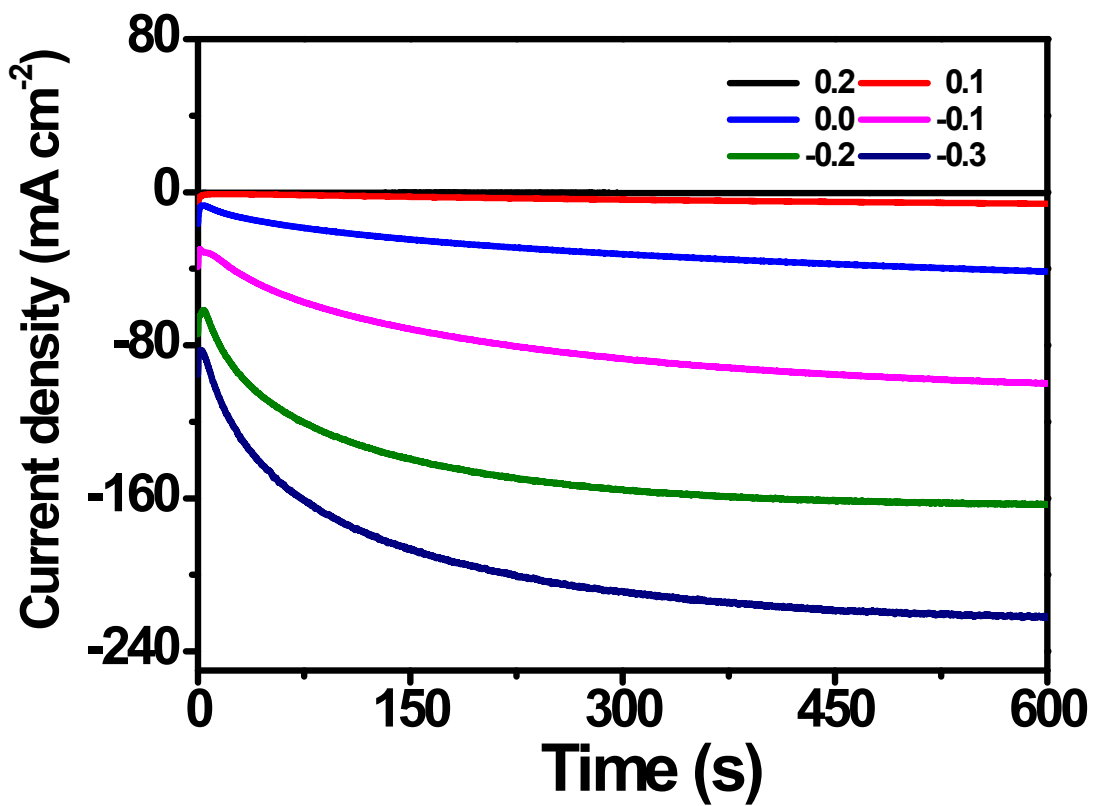

Fig. S7 Current-time plots measured at different potentials (vs. RHE) in 1.0 M NaOH with 0.1 M NaNO<sub>2</sub>.

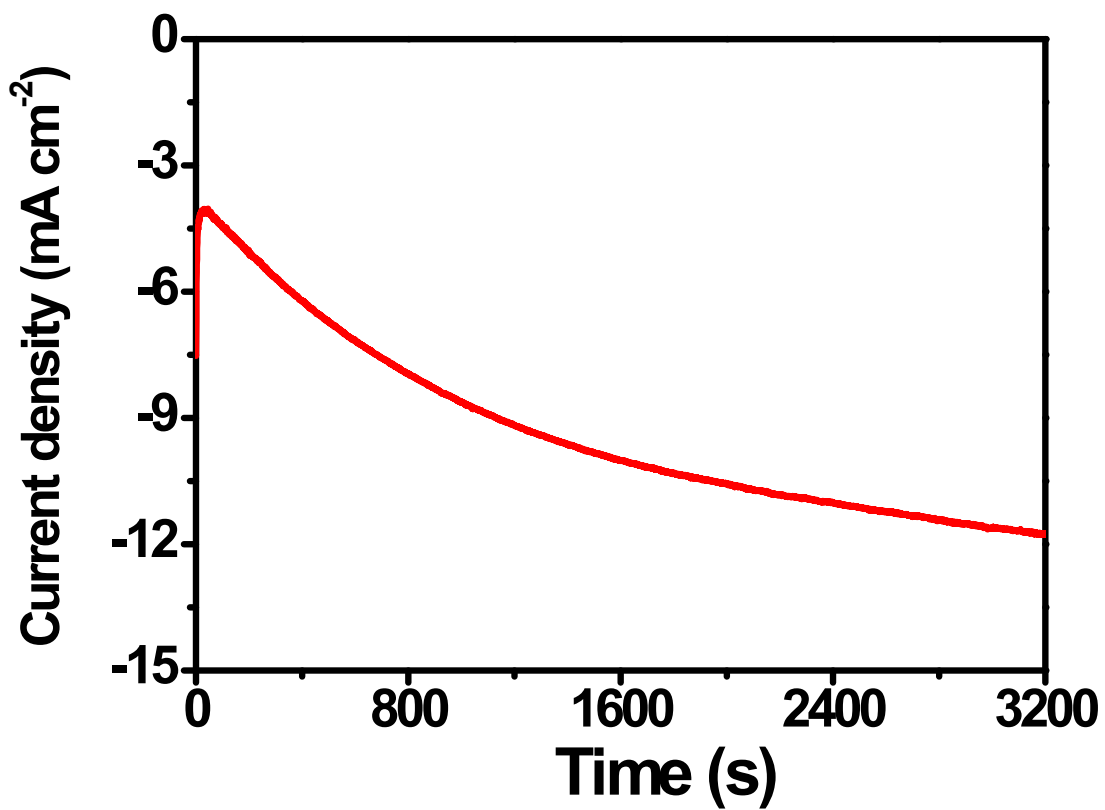

Fig. S8 Electrolysis at 0.0 V vs. RHE in 1.0 M NaOH with 0.1 M NaNO<sub>2</sub> and 0.1 M NH<sub>3</sub>.

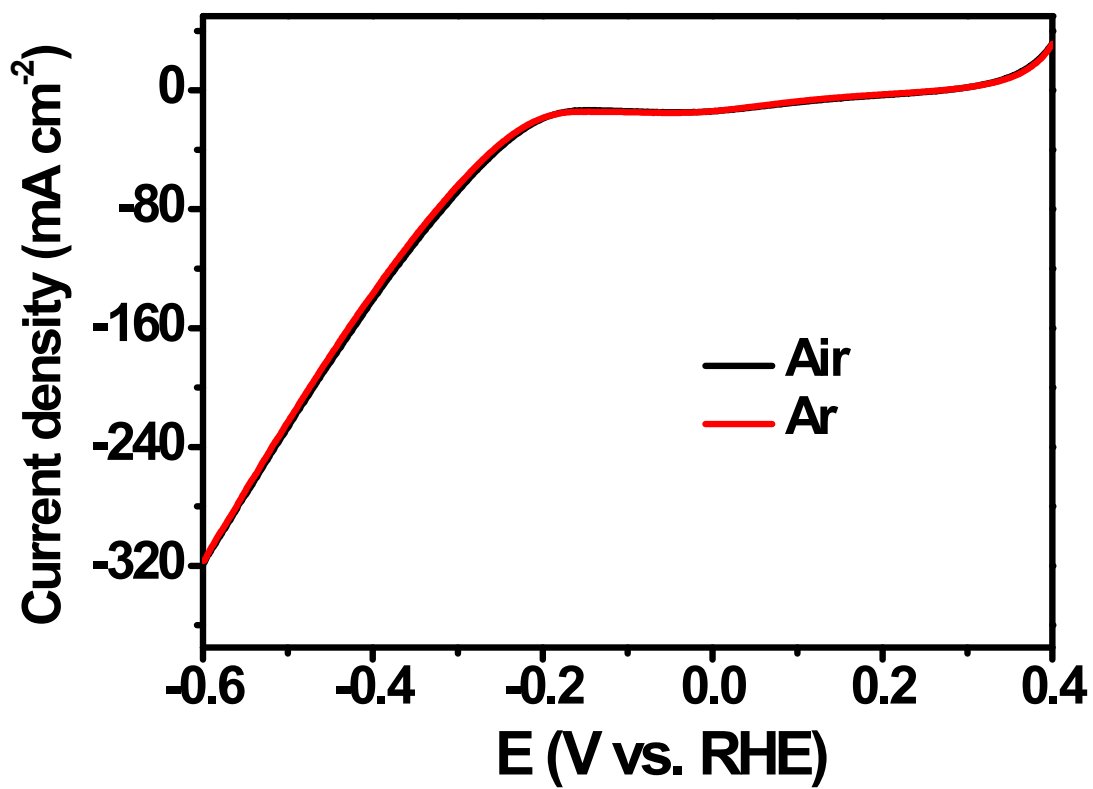

Fig. S9 LSV curves of Ni<sub>2</sub>P saturated with Ar and air in 1 M NaOH without NaNO<sub>2</sub>.

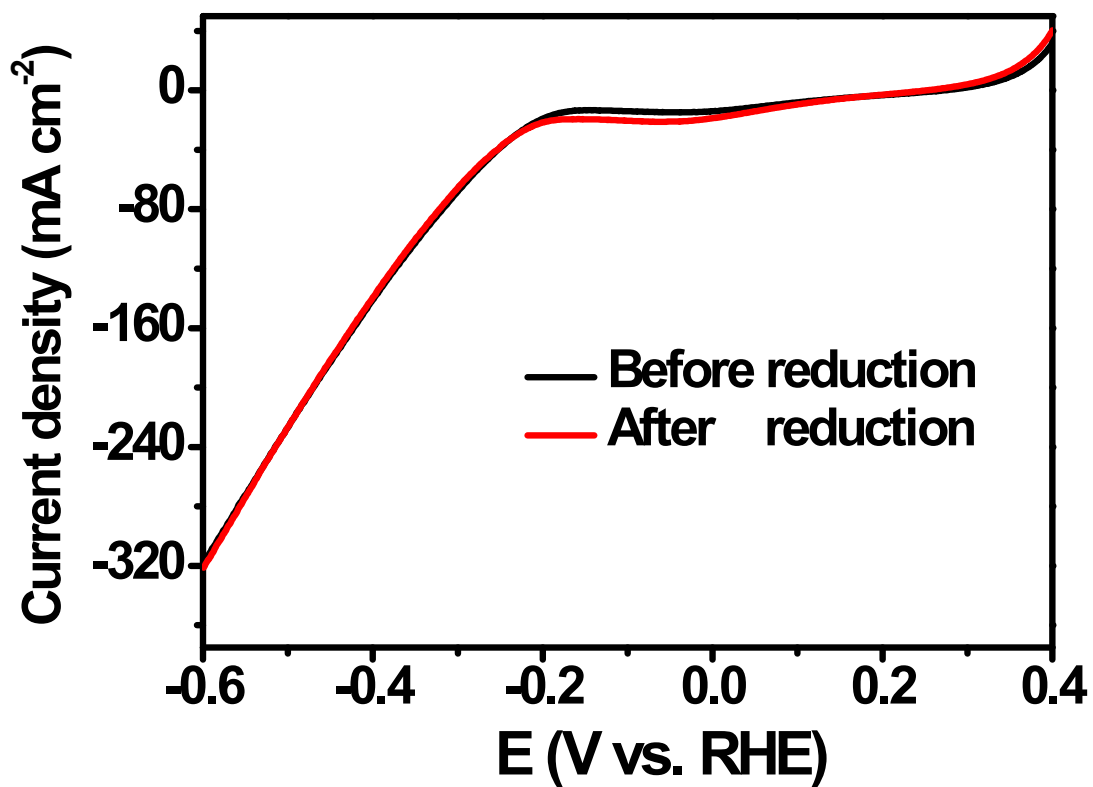

Fig. S10 LSV curves of Ni<sub>2</sub>P before and after pre-reduction at -0.3 V vs. RHE for 200 s.

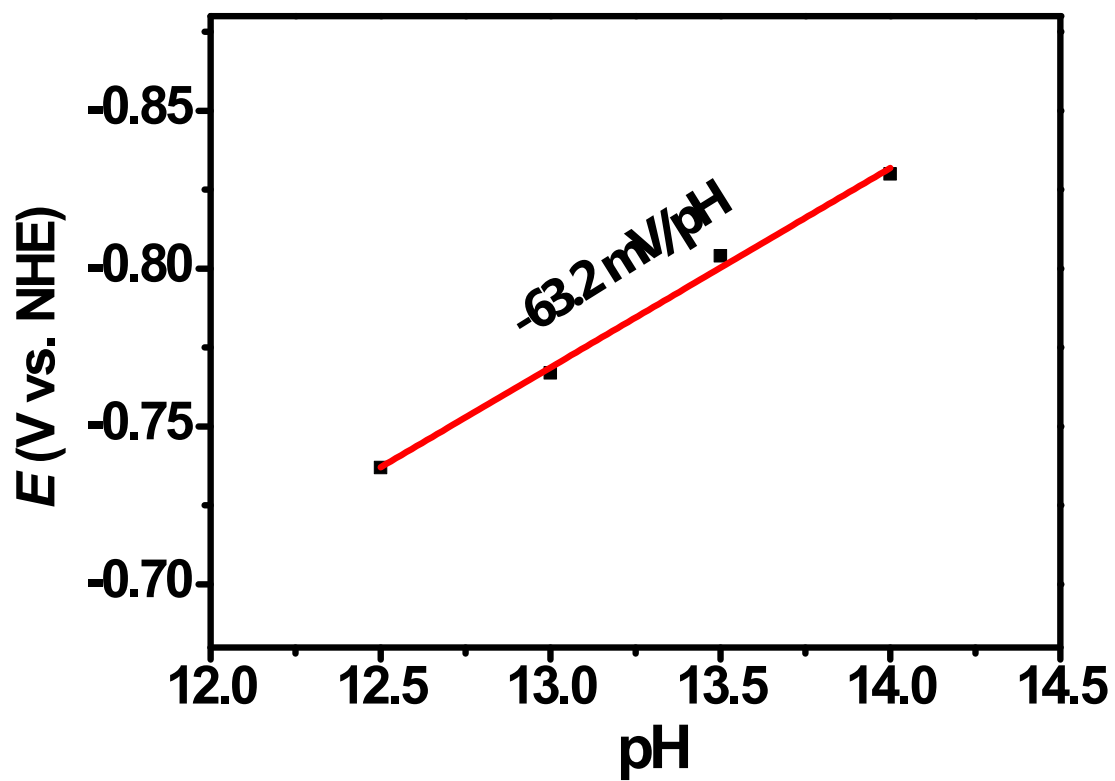

Fig. S11 Plot of potential versus pH for Ni<sub>2</sub>P in 1 M NaOH.

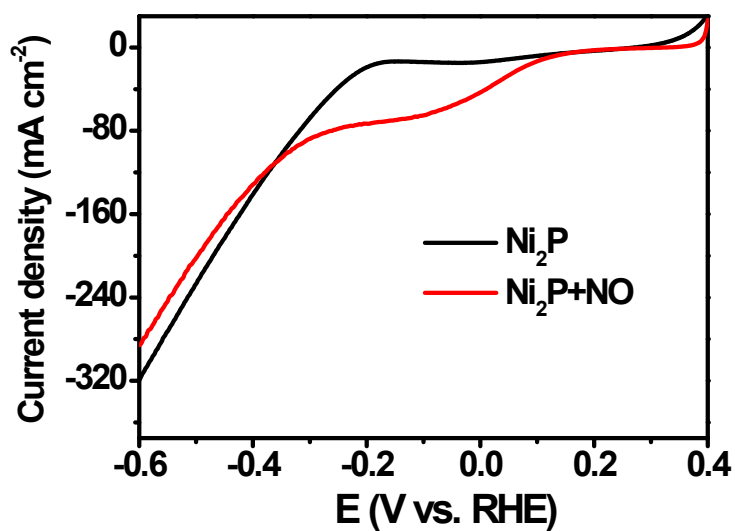

**Fig. S12** LSV curves of  $\text{Ni}_2\text{P}$  in 1 M NaOH with and without NO.

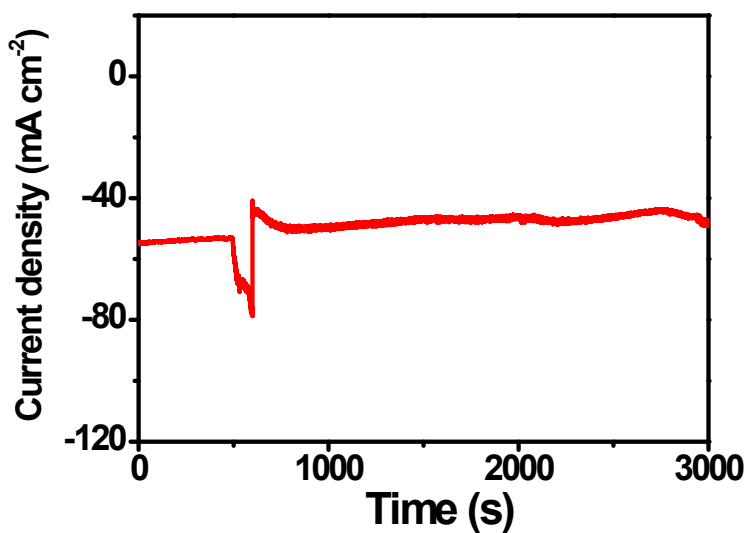

**Fig. S13** HER of  $\text{Ni}_2\text{P}$  at -0.3 V vs. RHE for 500 s, followed by blowing NO into the electrolyte and changing potential to 0.0 V vs. RHE.

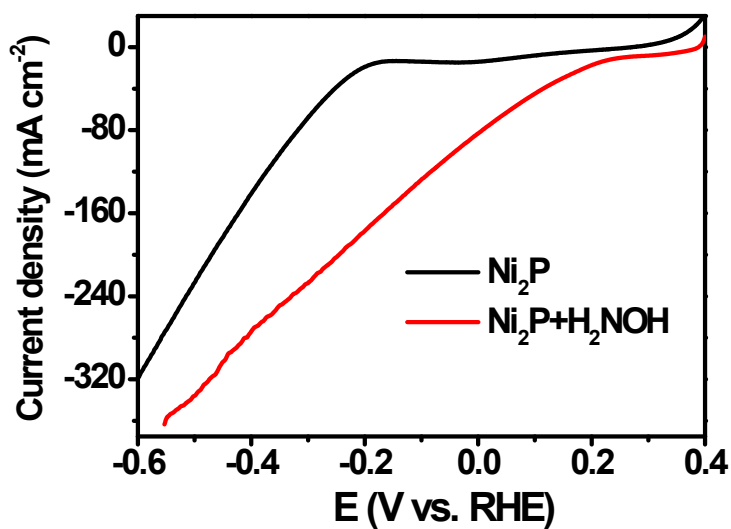

**Fig. S14** LSV curves of  $\text{Ni}_2\text{P}$  in 1 M NaOH with and without 0.1 M  $\text{H}_2\text{NOH}$ .

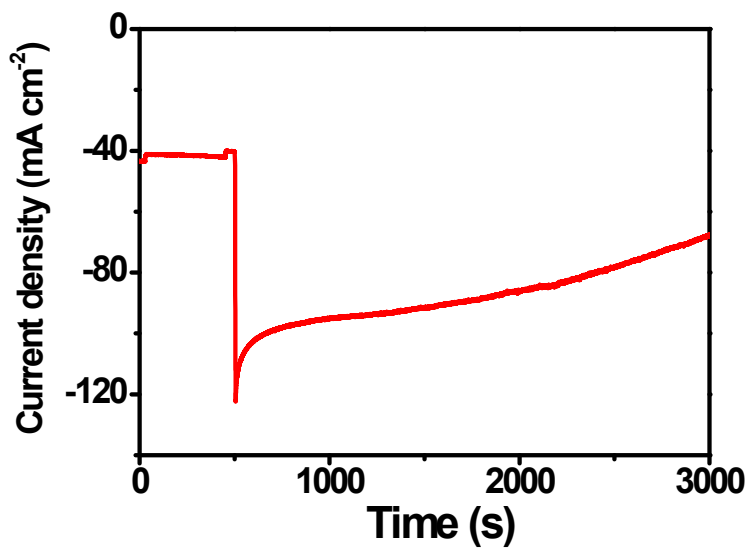

**Fig. S15** HER of  $\text{Ni}_2\text{P}$  at -0.3 V vs. RHE for 500 s, followed by adding 2 mmol  $\text{H}_2\text{NOH}$  into the electrolyte and changing potential to 0.0 V vs. RHE.

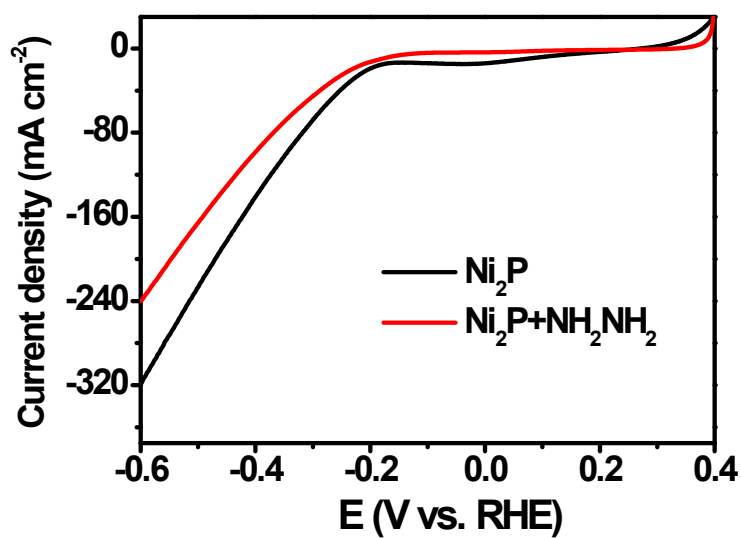

Fig. S16 LSV curves of Ni<sub>2</sub>P in 1 M NaOH with and without 0.1 M NH<sub>2</sub>NH<sub>2</sub>.

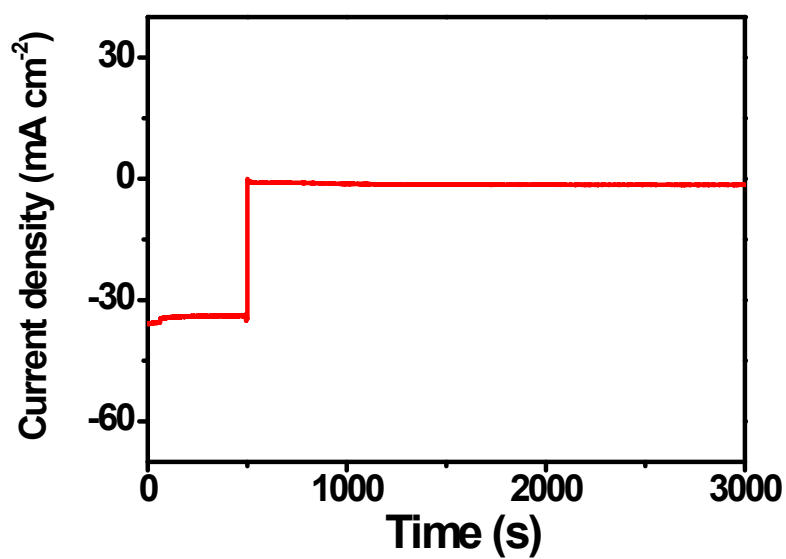

Fig. S17 HER of Ni<sub>2</sub>P at -0.3 V vs. RHE for 500 s, followed by adding 2 mmol NH<sub>2</sub>NH<sub>2</sub> into the electrolyte and changing potential to 0.0 V vs. RHE.



**Table S1** Comparison of Ni<sub>2</sub>P with the previously reported high performance nitrogen oxides reduction catalysts.

| <b>Catalysts</b>                                 | <b>Conditions</b>                                                                            | <b>Potential (V)</b> | <b>Ammonia synthesis rate</b>               | <b>FE (%)</b> | <b>Ref.</b> |
|--------------------------------------------------|----------------------------------------------------------------------------------------------|----------------------|---------------------------------------------|---------------|-------------|
| Ni <sub>2</sub> P                                | 1 M NaOH+<br>0.1 M NaNO <sub>2</sub>                                                         | 0.0 vs. RHE          | 677.2 μmol cm <sup>-2</sup> h <sup>-1</sup> | 92.6          | This work   |
| Cu <sub>50</sub> Ni <sub>50</sub>                | 1 M KOH+<br>0.1 M KNO <sub>3</sub>                                                           | 0.01 vs. RHE         | 80.7 μmol cm <sup>-2</sup> h <sup>-1</sup>  | 82.0          | S9          |
| MoFe protein                                     | HEPES buffer (0.25 M, pH 7.4)+<br>0.05 M NO <sub>2</sub> <sup>-</sup>                        | -0.57 vs. RHE        | 0.468 μmol cm <sup>-2</sup> h <sup>-1</sup> | ~100          | S10         |
| Cu foam                                          | 0.25 M Li <sub>2</sub> SO <sub>4</sub> +<br>saturated-NO                                     | -0.9 vs. RHE         | 517.1 μmol cm <sup>-2</sup> h <sup>-1</sup> | 93.5          | S11         |
| Cu/Cu <sub>2</sub> O nanowire arrays             | 0.5 M Na <sub>2</sub> SO <sub>4</sub> +<br>NaNO <sub>3</sub> (200 ppm of NO <sub>3</sub> -N) | -0.85 vs. RHE        | 244.9 μmol cm <sup>-2</sup> h <sup>-1</sup> | 95.8          | 10          |
| CuPc                                             | 0.1 M KOH+<br>0.1 M KNO <sub>2</sub>                                                         | -1.3 vs. NHE         | —                                           | 78.0          | 25          |
| NiAlMnCoCu alloy                                 | 0.5 M KOH+<br>0.05 M KNO <sub>3</sub>                                                        | -0.56 vs. NHE        | —                                           | 92.2          | S12         |
| Cobalt(II) porphyrazine                          | 0.5 M NaOH+<br>0.0028 M NaNO <sub>2</sub>                                                    | -1.39 vs. NHE        | 37.1 μmol cm <sup>-2</sup> h <sup>-1</sup>  | 97.0          | S13         |
| Strained Ru nanoclusters                         | 1 M KOH+<br>1 M KNO <sub>3</sub>                                                             | -0.2 vs. RHE         | 1170 μmol cm <sup>-2</sup> h <sup>-1</sup>  | ~100          | S14         |
| TiO <sub>2</sub> nanotubes with oxygen vacancies | 0.5 M Na <sub>2</sub> SO <sub>4</sub> +<br>NaNO <sub>3</sub> (50 ppm of NO <sub>3</sub> -N)  | -1.36 vs. NHE        | 45 μmol mg <sup>-1</sup> h <sup>-1</sup>    | 85.0          | S15         |
| Cobalt-tripeptide complex (CoGGH)                | MOPS buffer (1.0 M, pH 7.2)+<br>1.0 M NaNO <sub>2</sub>                                      | -0.24 vs. RHE        | 1984 μmol mg <sup>-1</sup> h <sup>-1</sup>  | 90.0          | S16         |

FE: The Faradaic efficiency of ammonia.

## References

- (S1) M. C. Payne, M. P. Teter, D. C. Allan, T. A. Arias and J. D. Joannopoulos, *Rev. Mod. Phys.*, 1992, **64**, 1045-1097.
- (S2) S. J. Clark, M. D. Segall, C. J. Pickard, P. J. Hasnip, M. J. Probert, K. Refson and M. C. Payne, *Z. Kristall.*, 2005, **220**, 567-570.
- (S3) W. Kohn, *Rev. Mod. Phys.*, 1999, **71**, 1253-1266.
- (S4) D. M. Ceperley and B. J. Alder, *Phys. Rev. Lett.*, 1980, **45**, 566-569.
- (S5) J. S. Lin, A. Qteish, M. C. Payne and V. Heine, *Phys. Rev. B*, 1993, **47**, 4174-4180.
- (S6) H. J. Monkhorst and J. D. Pack, *Phys. Rev. B*, 1976, **13**, 5188-5192.
- (S7) B. G. Pfrommer, M. Cote, S. G. Louie and M. L. Cohen, *Journal of Computational Physics*, 1997, **131**, 233-240.
- (S8) N. Govind, M. Petersen, G. Fitzgerald, D. King-Smith and J. Andzelm, *Comput. Mater. Sci.*, 2003, **28**, 250-258.
- (S9) Y. Wang, A. Xu, Z. Wang, L. Huang, J. Li, F. Li, J. Wicks, M. Luo, D.-H. Nam, C.-S. Tan, Y. Ding, J. Wu, Y. Lum, C.-T. Dinh, D. Sinton, G. Zheng and E. H. Sargent, *J. Am. Chem. Soc.*, 2020, **142**, 5702-5708.
- (S10) R. D. Milton, S. Abdellaoui, N. Khadka, D. R. Dean, D. Leech, L. C. Seefeldt and S. D. Minteer, *Energy Environ. Sci.*, 2016, **9**, 2550-2554.
- (S11) J. Long, S. Chen, Y. Zhang, C. Guo, X. Fu, D. Deng and J. Xiao, *Angew. Chem. Int. Ed.*, 2020, **59**, 9711-9718.
- (S12) C. Lu, S. Lu, W. Qiu and Q. Liu, *Electrochim. Acta*, 1999, **44**, 2193-2197.
- (S13) M. Thamae and T. Nyokong, *J. Electroanal. Chem.*, 1999, **470**, 126-135.
- (S14) J. Li, G. Zhan, J. Yang, F. Quan, C. Mao, Y. Liu, B. Wang, F. Lei, L. Li, A. W. M. Chan, L. Xu, Y. Shi, Y. Du, W. Hao, P. K. Wong, J. Wang, S.-X. Dou, L. Zhang and J. C. Yu, *J. Am. Chem. Soc.*, 2020, **142**, 7036-7046.
- (S15) R. Jia, Y. Wang, C. Wang, Y. Ling, Y. Yu and B. Zhang, *ACS Catal.*, 2020, **10**, 3533-3540.
- (S16) Y. Guo, J. R. Stroka, B. Kandemir, C. E. Dickerson and K. L. Bren, *J. Am. Chem. Soc.*, 2018, **140**, 16888-16892.
